# Supplementary material for: Molecular Inversion Probe-Based Sequencing of USH2A Exons and Splice Sites as a Cost-Effective Screening Tool in USH2 and arRP Cases
Source: MDPI journal article supplement (doi:10.3390/ijms22126419), 2021-06-15
Supplement: s1 [file s1]

**Table S1: All variants identified in this study that were classified as (likely or potentially) pathogenic.**

| Family ID | Phenotype | Variants (NM_206933.2)        | Protein effect variants | ACMG classification | Variants segregate with disease? | Remark                                |
|-----------|-----------|-------------------------------|-------------------------|---------------------|----------------------------------|---------------------------------------|
| W02-117   | USH2      | <u>c.8954del</u>              | p.(Gly2985Alafs*3)      | Pathogenic          | Yes                              |                                       |
|           |           | c.7121-8313_11048-962delins12 | p.(Val2374_Gly3683del)  | Pathogenic          |                                  |                                       |
| W02-118   | USH2      | <u>c.8079G&gt;A</u>           | p.(Trp2693*)            | Pathogenic          | Yes                              |                                       |
|           |           | c.7121-8313_11048-962delins12 | p.(Val2374_Gly3683del)  | Pathogenic          |                                  |                                       |
| W02-125   | USH2      | <u>c.1256G&gt;T</u>           | p.(Cys419Phe)           | Pathogenic          | Yes                              |                                       |
|           |           | c.7121-8313_11048-962delins12 | p.(Val2374_Gly3683del)  | Pathogenic          |                                  |                                       |
| W02-128   | USH2      | c.7121-8313_11048-962delins12 | p.(Val2374_Gly3683del)  | Pathogenic          | NT                               |                                       |
|           |           | c.7121-8313_11048-962delins12 | p.(Val2374_Gly3683del)  | Pathogenic          |                                  |                                       |
| W02-130   | USH2      | <u>c.10561T&gt;C</u>          | p.(Trp3521Arg)          | Pathogenic          | NT                               |                                       |
|           |           | c.949C>A                      | p.(=,Tyr318Cysfs*17)    | Pathogenic          |                                  |                                       |
| W02-142   | USH2      | <u>c.2299del</u>              | p.(Glu767Serfs*21)      | Pathogenic          | NT                               |                                       |
|           |           | c.14384T>G                    | p.(Leu4795Arg)          | Likely Pathogenic   |                                  |                                       |
| W02-440   | USH2      | <u>c.6722C&gt;T</u>           | p.(Pro2241Leu)          | Likely Pathogenic   | NT                               |                                       |
|           |           | c.7121-8313_11048-962delins12 | p.(Val2374_Gly3683del)  | Pathogenic          |                                  |                                       |
| W03-377B  | USH2      |                               |                         |                     | NT                               | Solved with variants in <i>ADGRV1</i> |
|           |           |                               |                         |                     |                                  |                                       |
| W09-0017  | USH2      | <u>c.2299del</u>              | p.(Glu767Serfs*21)      | Pathogenic          | NT                               | WGS initiated                         |
|           |           |                               |                         |                     |                                  |                                       |
| W19-0114  | arRP      | <u>c.14384T&gt;G</u>          | p.(Leu4795Arg)          | Likely Pathogenic   | NT                               |                                       |
|           |           | c.13274C>T                    | p.(Thr4425Met)          | Likely Pathogenic   |                                  |                                       |
| W19-0115  | arRP      | <u>c.1227G&gt;A</u>           | p.(Trp409*)             | Pathogenic          | NT                               |                                       |
|           |           | c.14384T>G                    | p.(Leu4795Arg)          | Likely Pathogenic   |                                  |                                       |
| W19-0117  | arRP      | <u>c.2276G&gt;T</u>           | p.(Cys759Phe)           | Pathogenic          | NT                               | WGS initiated                         |
|           |           |                               |                         |                     |                                  |                                       |

|          |      |                                 |                        |                   |     |               |
|----------|------|---------------------------------|------------------------|-------------------|-----|---------------|
| W19-0118 | arRP | <u>c.2299del</u>                | p.(Glu767Serfs*21)     | Pathogenic        | NT  | WGS initiated |
|          |      |                                 |                        |                   |     |               |
| W19-0120 | arRP | <u>c.9815C&gt;T</u>             | p.(Pro3272Leu)         | Likely Pathogenic | NT  |               |
|          |      | <u>c.9433C&gt;T</u>             | p.(Leu3145Phe)         | VUS               |     |               |
| W19-0121 | arRP | <u>c.2276G&gt;T</u>             | p.(Cys759Phe)          | Pathogenic        | NT  |               |
|          |      | <u>c.1227G&gt;A</u>             | p.(Trp409*)            | Pathogenic        |     |               |
| W19-0123 | arRP | <u>c.2276G&gt;T</u>             | p.(Cys759Phe)          | Pathogenic        | NT  | WGS initiated |
|          |      | <u>c.14583-20C&gt;G</u>         | p.(=)                  |                   |     |               |
| W19-0124 | arRP | <u>c.2299del</u>                | p.(Glu767Serfs*21)     | Pathogenic        | NT  | WGS initiated |
|          |      |                                 |                        |                   |     |               |
| W19-0125 | arRP | <u>c.2276G&gt;T</u>             | p.(Cys759Phe)          | Pathogenic        | NT  |               |
|          |      | <u>c.5516T&gt;A</u>             | p.(Val1839Glu)         | VUS*              |     |               |
| W19-0126 | arRP | <u>c.2299del</u>                | p.(Glu767Serfs*21)     | Pathogenic        | NT  | WGS initiated |
|          |      |                                 |                        |                   |     |               |
| W19-0128 | arRP | <u>c.11864G&gt;A</u>            | p.(Trp3955*)           | Pathogenic        | NT  |               |
|          |      | <u>c.9258+1G&gt;A</u>           | p.(?)                  | Pathogenic        |     |               |
| W19-0855 | USH2 | <u>c.11864G&gt;A</u>            | p.(Trp3955*)           | Pathogenic        | Yes |               |
|          |      | <u>c.4627+25435_4987+660del</u> | p.(Gly1543_Pro1662del) | Pathogenic        |     |               |
| W19-0856 | USH2 | <u>c.11864G&gt;A</u>            | p.(Trp3955*)           | Pathogenic        | Yes |               |
|          |      | <u>c.11048-2A&gt;G</u>          | p.(?)                  | Pathogenic        |     |               |
| W19-0857 | USH2 | <u>c.11864G&gt;A</u>            | p.(Trp3955*)           | Pathogenic        | Yes |               |
|          |      | <b>c.8559-?_8681+?del</b>       | p.(Tyr2854_Arg2894del) | Pathogenic        |     |               |
| W19-0858 | USH2 | <u>c.11864G&gt;A</u>            | p.(Trp3955*)           | Pathogenic        | Yes |               |
|          |      | <b>c.9388T&gt;G</b>             | p.(Trp3130Gly)         | Likely Pathogenic |     |               |
| W19-0859 | USH2 | <u>c.11864G&gt;A</u>            | p.(Trp3955*)           | Pathogenic        | Yes |               |
|          |      | <u>c.12234_12235del</u>         | p.(Asn4079Trpfs*19)    | Pathogenic        |     |               |
| W19-0860 | USH2 | <u>c.11864G&gt;A</u>            | p.(Trp3955*)           | Pathogenic        | Yes |               |
|          |      | <u>c.6967C&gt;T</u>             | p.(Arg2323*)           | Pathogenic        |     |               |
| W19-0861 | USH2 | <u>c.11864G&gt;A</u>            | p.(Trp3955*)           | Pathogenic        | Yes |               |

|          |      |                            |                          |                   |     |               |
|----------|------|----------------------------|--------------------------|-------------------|-----|---------------|
|          |      | <b>c.14303A&gt;C</b>       | p.(Tyr476Ser)            | Likely Pathogenic |     |               |
| W19-0862 | USH2 | c.11864G>A                 | p.(Trp3955*)             | Pathogenic        | NT  |               |
|          |      | c.1644+10004_1972-12164del | p.(Cys549_Gln657del)     | Pathogenic        |     |               |
| W19-0863 | USH2 | c.11864G>A                 | p.(Trp3955*)             | Pathogenic        | Yes |               |
|          |      | c.11328T>A                 | p.(Tyr3776*)             | Pathogenic        |     |               |
| W19-0864 | USH2 | c.11864G>A                 | p.(Trp3955*)             | Pathogenic        | Yes |               |
|          |      | c.10712C>T                 | p.(Thr3571Met)           | Likely Pathogenic |     |               |
| W19-0921 | USH2 | <b>c.11683G&gt;T</b>       | p.(Gly3895*)             | Pathogenic        | NT  |               |
|          |      | c.9371+1G>C                | p.(?)                    | Pathogenic        |     |               |
| W19-0923 | USH2 | <b>c.15286del</b>          | p.(Glu5096Lysfs*6)       | Pathogenic        | NT  |               |
|          |      | c.2299del                  | p.(Glu767Serfs*21)       | Pathogenic        |     |               |
| W19-0924 | USH2 | c.9371+1G>C                | p.(?)                    | Pathogenic        | NT  |               |
|          |      | c.7595-3C>G                | p.(Pro2533Asnfs*5)       | Pathogenic        |     |               |
| W19-0943 | USH2 | c.4645C>T                  | p.(Arg1549*)             | Pathogenic        | NT  |               |
|          |      | c.1606T>A                  | p.(Cys536Ser)            | VUS*              |     |               |
| W19-0944 | USH2 | c.8981G>A                  | p.(Trp2994*)             | Pathogenic        | NT  |               |
|          |      | c.13010C>T                 | p.(Thr4337Met)           | Likely Pathogenic |     |               |
| W19-0945 | USH2 | c.8740C>T                  | p.(Arg2914*)             | Pathogenic        | NT  |               |
|          |      | c.2299del                  | p.(Glu767Serfs*21)       | Pathogenic        |     |               |
| W19-0948 | USH2 | c.8981G>A                  | p.(Trp2994*)             | Pathogenic        | NT  |               |
|          |      | c.8740C>T                  | p.(Arg2914*)             | Pathogenic        |     |               |
| W19-0949 | USH2 | c.2299del                  | p.(Glu767Serfs*21)       | Pathogenic        | NT  |               |
|          |      | c.920_923dup               | p.(His308Glnfs*16)       | Pathogenic        |     |               |
| W19-0950 | USH2 | c.3187_3188del             | p.(Gln1063Serfs*15)      | Pathogenic        | NT  |               |
|          |      | c.8709C>T                  | p.(Arg2894_Asn2906del,=) | Pathogenic        |     |               |
| W19-0951 | USH2 | c.4510dup                  | p.(Arg1504Lysfs*26)      | Pathogenic        | NT  | WGS initiated |
|          |      |                            |                          |                   |     |               |

Variants that were reported as a first variant are underlined. Novel variants are indicated in bold. Classifications marked with an asterisk are VUS according to the ACMG guidelines but were predicted ‘potentially pathogenic’ as they met our pathogenicity criteria for missense variants. NT: not tested
