# Supplementary material for: Molecular Inversion Probe-Based Sequencing of USH2A Exons and Splice Sites as a Cost-Effective Screening Tool in USH2 and arRP Cases
Source: MDPI journal article supplement (doi:10.3390/ijms22126419), 2021-06-15
Supplement: s1 [file s1]

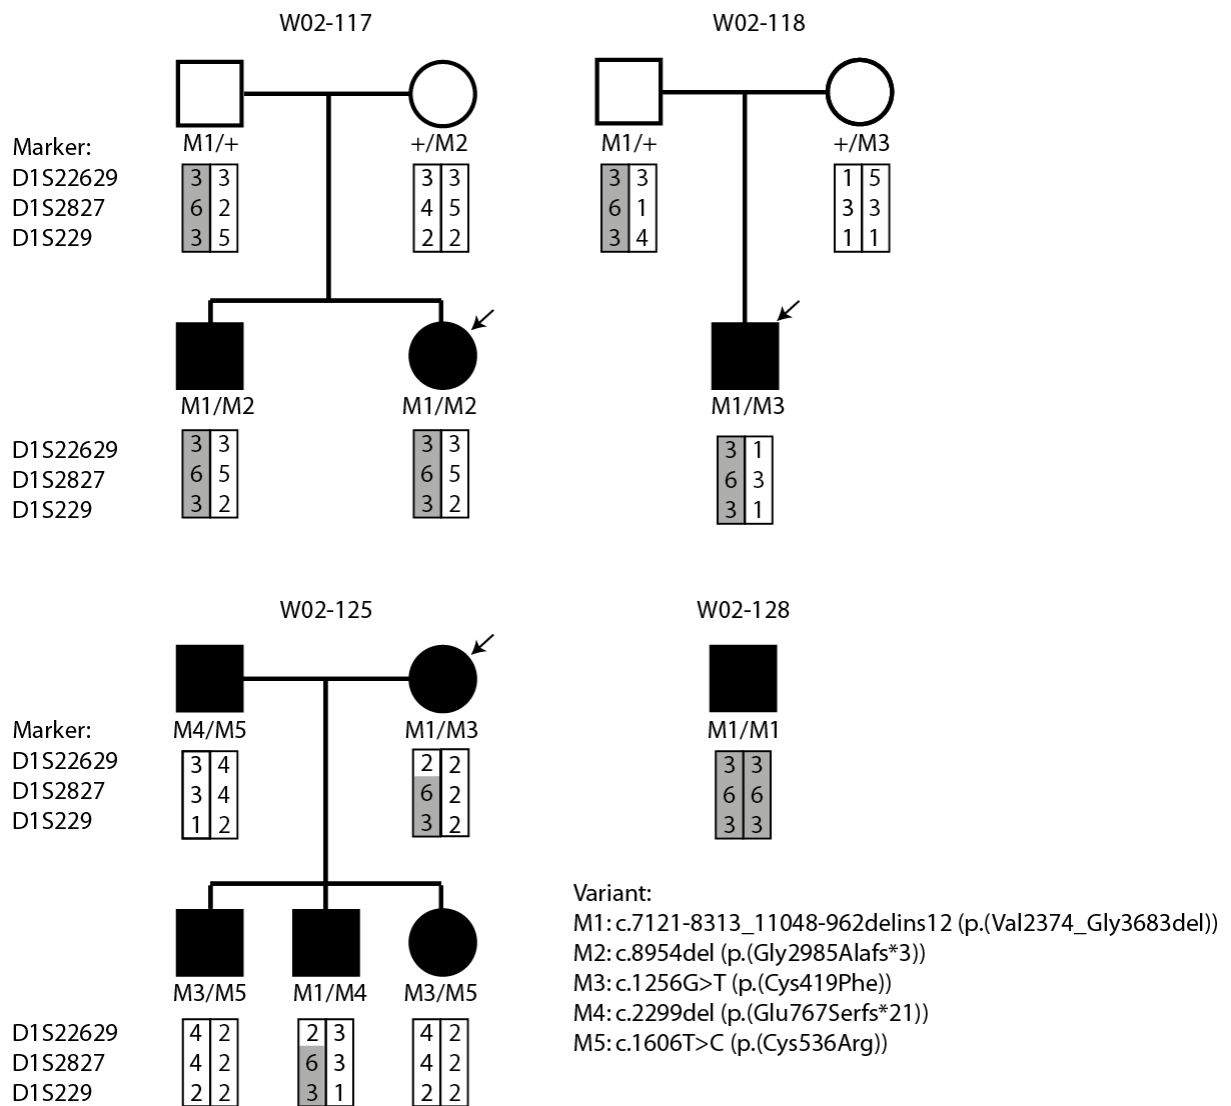

**Figure S1: Genotypes of VNTR-markers in four families carrying c.7121-8313\_11048-962delins12.** The haplotype with the deletion is highlighted in grey. Probands of complex families that were included in our study are indicated with an arrow.
