# Supplementary material for: Molecular Inversion Probe-Based Sequencing of USH2A Exons and Splice Sites as a Cost-Effective Screening Tool in USH2 and arRP Cases
Source: MDPI journal article supplement (doi:10.3390/ijms22126419), 2021-06-15
Supplement: s1 [file s1]

**Table S2: Sequences of primers employed to determine the CNV breakpoints that were identified in this study**

| <b>CNV</b>          | <b>Forward primer</b>  | <b>Reverse primer</b>    |
|---------------------|------------------------|--------------------------|
| Exon 10-11 deletion | TCCTCAGAAAGCATGCAAGC   | GGAGACACTACAACCTGAAACCAC |
| Exon 22-24 deletion | AGTAGGGTAAGGACGAACAGAC | TGTGTGTGTGTGTGTTTTAGAGGG |
| Exon 38-56 deletion | AGCTCTATTCTGTTCCTGGCT  | ACTCAAGAATCCAACCTGTTTGCT |
