# Supplementary material for: Molecular Inversion Probe-Based Sequencing of USH2A Exons and Splice Sites as a Cost-Effective Screening Tool in USH2 and arRP Cases
Source: MDPI journal article supplement (doi:10.3390/ijms22126419), 2021-06-15
Supplement: s1 [file s1]

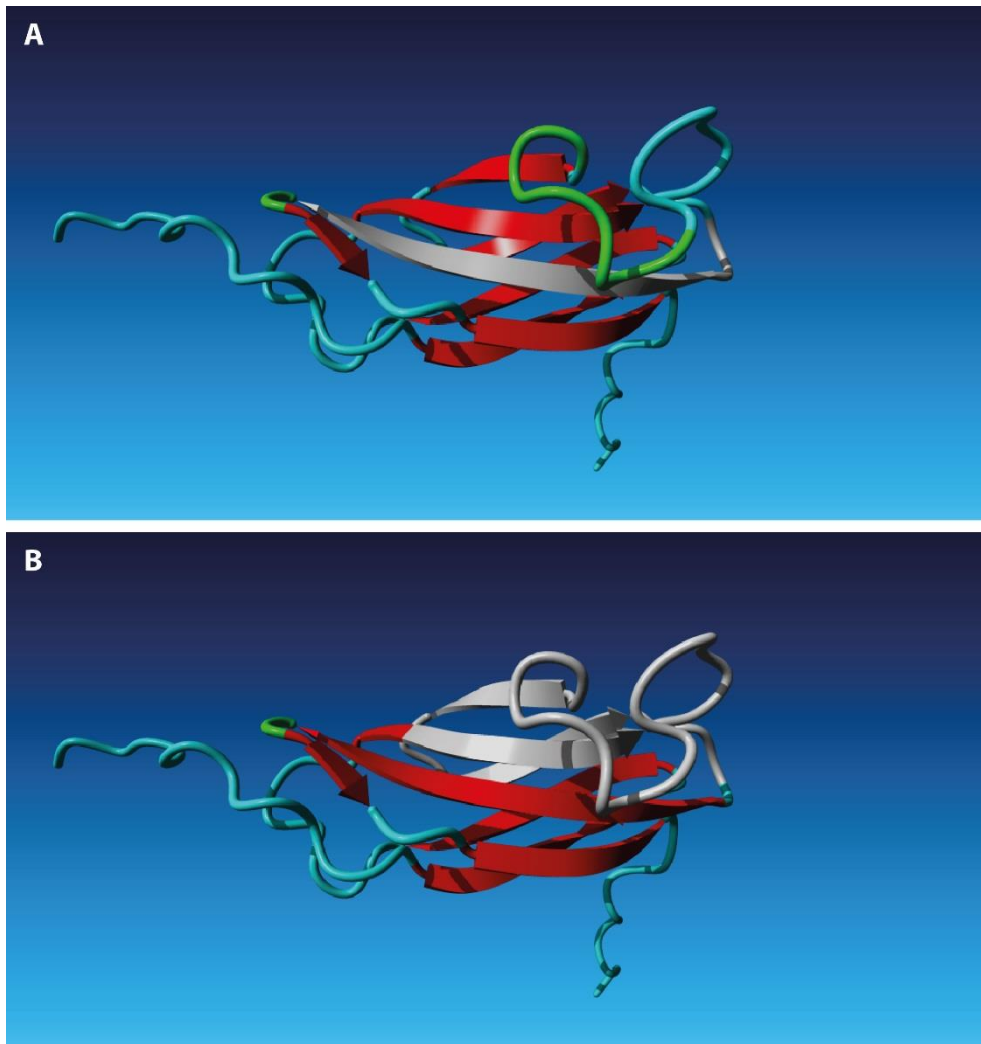

**Figure S2: In silico modeling of the effect of (A) c.8709C>T (p.(Arg2894\_Asn2906del,=)) and (B) c.8559-?\_8681+?del (p.(Tyr2854\_Arg2894del)).** The models are colored by secondary structure element (red = beta-strand, green=turn, cyan=loop). The deleted protein regions are depicted in grey.
