# Supplementary material for: Molecular Inversion Probe-Based Sequencing of USH2A Exons and Splice Sites as a Cost-Effective Screening Tool in USH2 and arRP Cases
Source: MDPI journal article supplement (doi:10.3390/ijms22126419), 2021-06-15
Supplement: s1 [file s1]

**Table S3: Sequences of primers that were employed to create the constructs for the minigene splice assays.**

| Variant       | Primers                                                  | Size of insert (nt) |
|---------------|----------------------------------------------------------|---------------------|
| c.8709C>T     | GGGGACAAGTTTGTACAAAAAAGCAGGCTTCccatgccac<br>accaccttg    | 2278                |
|               | GGGGACCACTTTGTACAAGAAAGCTGGGTGgctgtaaccac<br>attcaaggctg |                     |
| c.14583-20C>G | GGGGACAAGTTTGTACAAAAAAGCAGGCTTCcgtaacac<br>gtttgaggcac   | 4028                |
|               | GGGGACCACTTTGTACAAGAAAGCTGGGTGgccacgggaa<br>atgcaaatac   |                     |

Sequence of the Gateway® *attB* site is depicted in upper case, the *USH2A*-specific sequence in lower case letters.
